# Supplementary material for: Maize Global Transcriptomics Reveals Pervasive Leaf Diurnal Rhythms but Rhythms in Developing Ears Are Largely Limited to the Core Oscillator
Source: PLoS One. 2010 Sep 23;5(9):e12887. doi: 10.1371/journal.pone.0012887 (PMC2944807; doi:10.1371/journal.pone.0012887)
Supplement: Table S3 — A list of 47 putative genes diurnally expressed in ears. (0.04 MB XLS) [file pone.0012887.s010.xls]

## Sheet: Sheet1
Given gene name	annotation	category	cycling tissue	chr	Peak of expr	60 mer ID	60 mer seq	genomic BAC	PUBLIC EST
ZmCCA1	MYB-like protein	circadian clock regulator	Ear and Leaf	4	10am	A4204614	CAGATCTTGCAATGCAGTGCTTCATTAAAACTCAATCTGTTGTGTGCTGTATTTTAATGC	AC196205 Zea mays chromosome 4	NM_001154010
ZmLHY	MYB-like protein	circadian clock regulator	Ear and Leaf	10	10am	A4246692	ATTCTCCTTCGCTTCCACAGAACATCTCTTGTATGGTTTGAAGCCTGTTCGGCGCAATTT	AC213378 Zea mays chromosome 10	NM_001138057
ZmTOC1A	two-component pseudo-response regulator	circadian clock regulator	Ear and Leaf	4	6pm	A4271366	ATATCTGAAGACGAAGATGACGATCCATCGTCCAGGGAGGTAGATATGGTTTCTTCTCCA	AC195353 Zea mays chromosome 4	NM_001154351.1
ZmTOC1B	two-component pseudo-response regulator	circadian clock regulator	Ear and Leaf	5	6pm	A4244614	TGTTTTCACGTCCTATAAAAACTAACCTGAAGGTTGCTGAGTCGTCTGCATTTCTAGCAT	AC196675 Zea mays chromosome 5	XXX
ZmPRR73	two-component pseudo-response regulator	circadian clock regulator	Ear and Leaf	9	10am-2pm	A4313747	GGAGTGGCAATGACATGTATCAGAATCGGTTCCTGCAACGAGAAGCTGCATTGAACAAAT	AC205568 Zea mays chromosome 9	EU952116.1
ZmPRR37	two-component pseudo-response regulator	circadian clock regulator	Ear and Leaf	7	10am	A4303803	ACATATGTCAGACGGCTTGCTGCGAGCATGACACCACGACAAGAACAGCTAAAGAAATAT	AC195801 Zea mays chromosome 7	EU952111.1
Zm PRR59	two-component pseudo-response regulator	circadian clock regulator	Ear and Leaf	10	6pm	A4241676	GCAGGTCTTTTCCATATGGGACAGTAGCATTTTATTTATTAATTGGTTGATCATATGAGG	AC210923 Zea mays chromosome 10	XXXX
gigz1A	gigantea	circadian clock regulator	Ear and Leaf	8	6pm	A4249658	TGTTCTAGCTGCAGTTTGTGCCTTATCTTGTGAGCTCCAGCTGTTCCCTTTCATTACTAA	AC193462 Zea mays chromosome 8	BK006299.1
gigz1B	gigantea	circadian clock regulator	Ear and Leaf	3	6pm	A4229306	CAACATCGCTGTGAGGAAAACAACACCAACTCATCGGATAGTGCCAAGTTGGAAAACAAG	AC202834 Zea mays chromosome 3	BT039477.1
ZmZTLA	ZEITLUPE, protein-degrading F-box protein	circadian clock regulator	Ear and Leaf	2	6pm	A4289207	GACACCCCCTCGTTGATCCCATGGTCGTTTCAGAGATTCGGCGATGTCTCAGCGAGGGGA	AC203828 Zea mays chromosome 2	EU954587.1
ZmZTLB	ZEITLUPE, protein-degrading F-box protein	circadian clock regulator	Ear and Leaf	4	6pm	A4260413	GTGTATTTTGTTTTCATCGGAGAAGTTTCCTTTTATCGGTCTAGATAGATTCTATGGTCT	AC190896 Zea mays chromosome 4	NM_001152685.1
ZmMyb.L	MYB-like protein	REVEILLE1 homolog	Ear and Leaf	5	6am	A4299773	ACAATAGCCCATCGGTTGAAACTAATTCTGATCGCACGGGCAATGTTCATGTTCAGACGA	AC206634 Zea mays chromosome 5	BT067765.1
ZmCO-like	CONSTANS- like	flowering time gene	Ear and Leaf	1	6pm	A4278207	CTACGCACGCGGCCCAAGTTTAATTTTGCGTTGAAGCTATAGCGATCGTGGCCATTGTTG	AC213671 Zea mays chromosome 1	BT066134.1
ZmCAB-chr1	chlorophyll a/b binding protein	light-harvesting	Ear and Leaf	1	10am-2pm	A4243916	TGAACAGTGTGGTCTTCTCTGTACTCTACTTGTTCAGATCGTAGGCGTGTAGTAGTTGCA	AC194312 Zea mays chromosome 1	NM_001154799.1
ZmCAB-chr8	chlorophyll a/b-binding protein 2	light-harvesting	Ear Specific	8	10am-2pm	A4261134	AAGGTCAAGGAGATCAAGAACGGCCGCCTCGCCATGTTCTCCATGTTCGGCTTCTTCGTG	AC217306 Zea mays chromosome 8	EU956509.1
ZmCAB-chr3	chlorophyll a/b binding protein 2	light-harvesting	Ear and Leaf	3	10am-2pm	A4286196	CCCCGGCGACTACGGGTGGGACACCGCGGGGTTGTCGGCGGACCCGGAGACCTTCGCCAA	AC208915 Zea mays chromosome 3	NM_001154967.1
ZmCAB-chr7	chlorophyll a/b binding protein 2	light-harvesting	Ear and Leaf	7	10am-2pm	A4252085	GAAGGAGCTCAAGAACGGCCGCCTCGCCATGTTTTCCATGTTCGGCTTCTTCGTCCAGGC	AC217104 Zea mays chromosome 7	NM_001154167.1
ZmCAB-chr7	chlorophyll a/b binding protein of LHCII type III	light-harvesting	Ear and Leaf	7	10am-2pm	A4248783	GGCCGGATCACCATGGGCAACGACCTGTGGTACGGCCCGGACCGCGTCAAGTACCTGGGG	AC198603 Zea mays chromosome 7	NM_001157051.1
ZmCAB-chr10	chlorophyll a/b binding protein CP24	light-harvesting	Ear and Leaf	10	10am-2pm	A4293970	AAGCTGGCCGAGATCAAGCACGCCCGCATCGCCATGCTTGCCATGCTCGCCTTCTACTTC	AC200322 Zea mays chromosome 10	EU967333.1
ZmCAB-chr2	chlorophyll a/b binding protein CP24	light-harvesting	Ear and Leaf	2	10am-2pm	A4204238	GATCCCCGCCTTCAAGAGCGACGCCGAGTTCATCAACCCGCCCTGGCTCGACGGATCGCT	AC177863 Zea mays chromosome 2	NM_001154934.1
ZmCAB-chr2	chlorophyll a/b-binding protein CP24	light-harvesting	Ear and Leaf	2	10am-2pm	A4219468	TGTAGTGTATAGTAGTCTGGATCGATTCATGGGACCAATTAAGGCAGAATGAGTGAGCGA	AC177863 Zea mays chromosome 2	NM_001148160.1
ZmCAB-chr7	chlorophyll a/b-binding protein CP29	light-harvesting	Ear Specific	7	10am-2pm	A4293500	ACCATCTTCGACACGTTCGGAGGATCCTCTTAAGCCCGCCATTGATCCGCTCCGTCCATC	AC198600 Zea mays chromosome 7	NM_001143134.1
ZmCAB-chr7	chlorophyll a/b-binding protein CP29	light-harvesting	Ear Specific	7	10am-2pm	A4252455	ACCCACCTGAGCGACCCGCTCCACACTACCATCTTCGACACGTTCGGAGGGTCCTCTTAA	AC198600 Zea mays chromosome 7	NM_001112032.1
ZmCAB-chr4	chlorophyll a/b binding protein 6A	light-harvesting	Ear and Leaf	4	10am-2pm	A4196891	TCTCCCCTTGACAATTATATTGGTTGATTATTACGACTAGGCACTAGGCACTGCCTGCCT	AC209356 Zea mays chromosome 4	NM_001156114.1
ZmCAB-chr5	chlorophyll a/b binding protein 6A	light-harvesting	Ear Specific	5	10am-2pm	A4286693	TCGGCTTCTCCAAGGACCCCGCCAAGTTCGAGGAGTACAAGCTCAAGGAGATCAAGAACG	AC225178 Zea mays chromosome 5	NM_001154711.1
ZmCAB-chr8	chlorophyll a/b binding protein M9	light-harvesting	Ear Specific	8	10am-2pm	A4252005	ATTACTTACCGTACCAGGGTTCAATCGGCAAGGAAGAATTGTTGTGTTCACTGTCTTGGG	AC220958 Zea mays chromosome 8	BT040689.1
ZmZF-5	zinc finger protein	transcription factor	Ear Specific	5	10am	A4296863	CTGATGTGTACGGTGTACCAGAGAAGAATTTTACTGTGTACAAGCTAGTGTCAAGTGTTG	AC186313 Zea mays chromosome 5	BT039586.1
ZmSAPK9	osmotic stress/abscisic acid-activated serine/threonine-protein kinase	hormone signaling	Ear Specific	1	6pm	A4244483	TGGGCGTGCAGTACTCGGTTCCAGACTACGTCCACATATCTCCGGAATGCCAGGACCTAA	AC208970 Zea mays chromosome 1	NM_001136714.1
ZmPKM2	phytol kinase 2 membrane cytidylyltransferases.	transport	Ear and Leaf	2	6pm-2am	A4266842	CCTTTGGCCACCATGCTGGTAGCTTTTCTCTTGTTTAGCTCCAACCGCACAATAGTTAAT	AC209169 Zea mays chromosome 2	EU965573.1
ZmMCP	Mitochondrial carrier protein	transport	Ear and Leaf	3	6am	A4316348	ATATAGGCAATCAAGTCAGTTTGCCTCGCGAAGAGTATAGGCGAGTATTATGATCGGGTG	AC201826 Zea mays chromosome 3	NM_001139083.1
ZmFAO	Flavin containing amine oxidoreductase	enzyme	Ear and Leaf	2	6pm	A4207354	GGCACTGAAAGTGTCATCGCGTCACTCTTTCATACTTATTAATAAATATCACAAGTCTGT	AC208803 Zea mays chromosome 2	BT033744.2
ZmPP2C	Protein phosphatase 2C serine/threonine phosphatase	enzyme	Ear and Leaf	5	6am	A4285915	ATTTGAACGAAAGTTGTACACTGCAGTATGTAACAATCTCCTAGATCCGCCTTTTGTGGC	AC233959 Zea mays chromosome 5	EZ107826.1
ZmISB	4Fe-4S ferredoxin, iron-sulfur binding protein	enzyme	Ear and Leaf	8	6pm	A4278870	GCTATGGAACCTGGAGTGCCGTGGTGCTGCAAACATCTCATGTTTCATTCTGAAATCTTT	AC214755 Zea mays chromosome 8	NM_001157658.1
ZmTHI-1	thiamine biosynthetic enzyme (thi1-1	enzyme	Ear and Leaf	8	6pm	A4278451	AATTGCCTTGTTGTTCAATGATGAATCGATCGAATTCCCTTGGGTTAGCTTTATTATTGT	AC196020 Zea mays chromosome 8	NM_001112226.1
ZmCS	cysteine synthase	enzyme	Ear and Leaf	9	10am-2pm	A4285554	TTAGATGGACTGGGCCTGAGATCTGGAAGGACACCGCCGGTAAGGTGGACATATTCGTGG	AC201977 Zea mays chromosome 9	EU974467.1
ZmHSF2	heat shock transcription factor 2 (HSF)	heat shock	Ear and Leaf	5	2pm-6pm	A4209008	CTAGCCAACAAGCTTTCGGTAGCCATGCTAGTGATCCCTATCTGATGGACATCGCCAACA	AC210316 Zea mays chromosome 5	NM_001154496.1
ZmDNAJ	chaperone protein DnaJ domains hsp70 heat-shock	heat shock	Ear and Leaf	9	2pm-6pm	A4285851	ACATGGCCTTCTTCCCCTTGTCCGATAAAACTGAGTAGGCCTCCTGGATCCGCTGGAACC	AC203742 Zea mays chromosome 9	NM_001158501.1
ZmPVR3	PVR3-like protein Protease inhibitor	protease	Ear and Leaf	2	10am	A4250442	ACAAGAACTCGCCGTGGATGGGCGTCTACAACATCGACCCCAAGCGCGCCATGGAGCTTC	AC191296 Zea mays chromosome 2	NM_001159089.1
ZmDUF1685	DUF1685 domain of unknown function	hypothetical protein	Ear and Leaf	3	6am	A4207533	CAATTGGAGGATCTCTGGCCCGGGTGACGATCCAGAAGAAGTGAAGGCGAGGTTGAAGTA	AC215180 Zea mays chromosome 3	NM_001150693.1
ZmDUF1475	DUF1475 domain of unknown function	hypothetical protein	Ear and Leaf	9	10am-2pm	A4243893	ACACCGTCTGGGTTGCTCACAAGGAATCATCATGGATATCAACTACCATTTGGATTGTCT	AC210214 Zea mays chromosome 9	EU969059.1
ZmDUF2301	DUF2301 integral membrane protein	hypothetical protein	Ear and Leaf	1	6pm	A4257267	TTTTCATGTTCAACGCTCTCCCTGAAGAGGAAAAGAAGGCTTGGATCCAGAAACTCGAGA	AC177870 Zea mays chromosome 1	EU956086.1
ZmHYPO-chr2b	hypothetical protein	hypothetical protein	Ear and Leaf	2	6am	A4275320	ATTGCTGAGGAAACCACTGGGAGGGTATATGTTTGTTGCAGGAAATTTCTTAGTGCTTCA	AC191270 Zea mays chromosome 2	NM_001149493.1
ZmHYPO-chr2a	hypothetical protein	hypothetical protein	Ear and Leaf	2	10am	A4196243	CCGCCTGTGCTCTGGAGCCGGAGTATTGTGTGCCATTAGAAACTGTACAAAAGATTAATA	AC199567 Zea mays chromosome 2	NM_001138465.1
ZmHYPO-chr4	hypothetical protein	hypothetical protein	Ear and Leaf	4	6am-10am	A4296440	TTTGTCCTTTTCCTCCCTAATTATTTTAGTAATTAACGAGATCGATCGTGTGGTGTCGTT	AC187568 Zea mays chromosome 4	NM_001153073.1
ZmHYPO-chr9	hypothetical protein	hypothetical protein	Ear and Leaf	9	10am	A4261515	TAGACGGCCGATGTGCTAACCTAGTGGTGTTGACTCACATTTTATGCGTAATCTAAAAAA	AC208979 Zea mays chromosome 9	BT070094.1
ZmHYPO-chr7	hypothetical protein	hypothetical protein	Ear and Leaf	6	6pm-10pm	A4277412	TGGAGCTGACACATGATATCGCCCCTTTTTACTTAGTCTGATTAGAAGATTGCGTGCGTG	AC203077 Zea mays chromosome 6	NM_001151305.1
ZmHYPO-chr4	hypothetical protein	hypothetical protein	Ear Specific	4	10am-2pm	A4248575	TCTCTGGAGAGCTTTGTACGACGATGGAGAACAACAGTGTACGATCGAACTGGACGCCAT	AC193333 Zea mays chromosome 4	NM_001149907.1
